# Supplementary material for: Remdesivir for Patients Hospitalized with COVID-19 Severe Pneumonia: A National Cohort Study (Remdeco-19)
Source: MDPI journal article supplement (doi:10.3390/jcm11216545), 2022-11-04
Supplement: s1 [file s1]

# ADDITIONAL FILE

**Supplementary Table S1. Control and remdesivir cohorts.**

| REMDESIVIR | Age | SexH=1 | BMI | SOFA<br>Day 0 | Leukocytes<br>Day 0 | Diabete | Cancer | Alive Day 90 |
|------------|-----|--------|-----|---------------|---------------------|---------|--------|--------------|
| 0          | 42  | 1      | 32  | 3             | 5800                | 0       | 0      | 0            |
| 0          | 70  | 0      | 25  | 11            | 7900                | 0       | 0      | 1            |
| 0          | 81  | 1      | 27  | 9             | 3100                | 0       | 1      | 0            |
| 0          | 70  | 0      | 29  | 5             | 11200               | 0       | 0      | 0            |
| 0          | 78  | 1      | 26  | 5             | 9700                | 1       | 0      | 0            |
| 0          | 55  | 0      | 32  | 4             | 5900                | 0       | 1      | 1            |
| 0          | 54  | 1      | 26  | 9             | 3500                | 1       | 0      | 1            |
| 0          | 63  | 1      | 22  | 12            | 6900                | 0       | 0      | 1            |
| 0          | 80  | 1      | 24  | 9             | 4000                | 0       | 0      | 1            |
| 0          | 77  | 1      | 24  | 6             | 6800                | 0       | 1      | 0            |
| 0          | 76  | 1      | 29  | 6             | 6400                | 1       | 0      | 0            |
| 0          | 79  | 0      | 19  | 4             | 10000               | 0       | 0      | 1            |
| 0          | 55  | 0      | 35  | 10            | 2500                | 0       | 0      | 1            |
| 0          | 58  | 1      | 26  | 11            | 3000                | 0       | 0      | 1            |
| 0          | 40  | 1      | 23  | 7             | 4500                | 1       | 0      | 1            |
| 0          | 75  | 1      | 26  | 14            | 5500                | 1       | 0      | 0            |
| 0          | 74  | 0      | 30  | 9             | 2600                | 0       | 1      | 0            |
| 0          | 83  | 0      | 20  | 14            | 5100                | 0       | 0      | 1            |
| 0          | 76  | 1      | 26  | 10            | 8000                | 1       | 0      | 0            |
| 0          | 74  | 1      | 33  | 5             | 4900                | 0       | 1      | 0            |
| 0          | 52  | 1      | 30  | 10            | 7000                | 0       | 0      | 1            |
| 0          | 69  | 1      | 30  | 4             | 7200                | 0       | 0      | 1            |
| 0          | 63  | 1      | 27  | 13            | 8500                | 0       | 0      | 1            |
| 0          | 61  | 0      | 63  | 14            | 9000                | 1       | 0      | 1            |
| 0          | 61  | 0      | 32  | 15            | 9000                | 0       | 0      | 1            |
| 0          | 57  | 1      | 29  | 12            | 10800               | 1       | 0      | 0            |
| 0          | 45  | 1      | 26  | 13            | 13400               | 0       | 0      | 1            |
| 0          | 50  | 1      | 29  | 11            | 7100                | 0       | 0      | 1            |
| 0          | 61  | 1      | 29  | 14            | 6900                | 0       | 0      | 1            |
| 0          | 62  | 1      | 28  | 8             | 14400               | 0       | 0      | 1            |
| 0          | 38  | 0      | 23  | 13            | 10000               | 0       | 0      | 1            |
| 0          | 42  | 1      | 33  | 14            | 15900               | 0       | 0      | 0            |
| 0          | 69  | 1      | 26  | 11            | 9800                | 0       | 0      | 1            |

|   |    |   |    |    |       |   |   |   |
|---|----|---|----|----|-------|---|---|---|
| 0 | 64 | 1 | 27 | 11 | 12400 | 0 | 0 | 1 |
| 1 | 61 | 1 | 25 | 13 | 8700  | 0 | 0 | 1 |
| 1 | 50 | 0 | 28 | 13 | 8400  | 0 | 0 | 1 |
| 1 | 77 | 1 | 27 | 13 | 17700 | 0 | 0 | 0 |
| 1 | 65 | 1 | 25 | 9  | 36630 | 0 | 1 | 1 |
| 1 | 60 | 1 | 28 | 14 | 11200 | 0 | 0 | 0 |
| 1 | 40 | 0 | 27 | 8  | 5000  | 1 | 1 | 1 |
| 1 | 37 | 1 | 27 | 3  | 8340  | 0 | 0 | 1 |
| 1 | 73 | 1 | 34 | 13 | 8500  | 1 | 0 | 1 |
| 1 | 51 | 1 | 27 | 9  | 7280  | 0 | 0 | 1 |
| 1 | 52 | 1 | 27 | 10 | 10210 | 1 | 0 | 1 |
| 1 | 67 | 0 | 25 | 8  | 11010 | 0 | 1 | 1 |
| 1 | 59 | 0 | 36 | 13 | 8430  | 0 | 0 | 1 |
| 1 | 54 | 0 | 36 | 2  | 8540  | 1 | 0 | 1 |
| 1 | 43 | 1 | 21 | 14 | 12910 | 0 | 0 | 1 |
| 1 | 70 | 1 | 29 | 15 | 11500 | 0 | 0 | 0 |
| 1 | 80 | 1 | 29 | 8  | 12500 | 0 | 0 | 0 |
| 1 | 42 | 1 | 26 | 11 | 6600  | 0 | 0 | 1 |
| 1 | 39 | 1 | 28 | 9  | 11200 | 0 | 0 | 1 |
| 1 | 35 | 0 | 36 | 6  | 45500 | 0 | 0 | 1 |
| 1 | 49 | 1 | 31 | 3  | 15990 | 0 | 0 | 1 |
| 1 | 25 | 1 | 26 | 12 | 15740 | 0 | 0 | 1 |
| 1 | 38 | 1 | 40 | 9  | 5120  | 0 | 0 | 1 |
| 1 | 61 | 1 | 29 | 9  | 12000 | 0 | 0 | 1 |
| 1 | 40 | 1 | 27 | 6  | 6000  | 0 | 0 | 1 |
| 1 | 69 | 0 | 32 | 5  | 6000  | 1 | 0 | 1 |
| 1 | 71 | 1 | 31 | 6  | 6040  | 0 | 0 | 1 |
| 1 | 76 | 0 | 27 | 8  | 13620 | 0 | 0 | 0 |
| 1 | 41 | 1 | 32 | 7  | 15990 | 0 | 0 | 1 |
| 1 | 70 | 1 | 25 | 10 | 11240 | 0 | 0 | 1 |
| 1 | 80 | 0 | 28 | 7  | 11100 | 0 | 0 | 1 |
| 1 | 63 | 1 | 23 | 8  | 78000 | 0 | 0 | 1 |
| 1 | 76 | 1 | 30 | 10 | 6910  | 0 | 0 | 1 |
| 1 | 58 | 1 | 32 | 6  | 6710  | 0 | 0 | 1 |
| 1 | 68 | 1 | 28 | 8  | 12290 | 0 | 0 | 0 |
| 1 | 67 | 1 | 32 | 5  | 5000  | 0 | 0 | 1 |
| 1 | 70 | 0 | 25 | 4  | 9000  | 0 | 0 | 1 |
| 1 | 60 | 0 | 46 | 6  | 13000 | 0 | 0 | 0 |
| 1 | 52 | 1 | 33 | 3  | 7000  | 0 | 0 | 1 |
| 1 | 49 | 1 | 28 | 4  | 6000  | 0 | 0 | 1 |
| 1 | 81 | 1 | 29 | 10 | 12000 | 0 | 0 | 0 |
| 1 | 61 | 1 | 44 | 8  | 7500  | 0 | 0 | 1 |
| 1 | 57 | 0 | 38 | 7  | 10600 | 0 | 0 | 1 |
| 1 | 69 | 1 | 30 | 10 | 9900  | 0 | 0 | 1 |

|   |    |   |    |    |        |   |   |   |
|---|----|---|----|----|--------|---|---|---|
| 1 | 40 | 0 | 29 | 5  | 4400   | 1 | 0 | 1 |
| 1 | 85 | 0 | 27 | 7  | 13100  | 0 | 0 | 0 |
| 1 | 80 | 1 | 23 | 11 | 14200  | 0 | 0 | 0 |
| 1 | 53 | 1 | 22 | 8  | 12500  | 0 | 0 | 1 |
| 1 | 74 | 1 | 34 | 7  | 17800  | 1 | 0 | 1 |
| 1 | 75 | 1 | 22 | 15 | 7000   | 0 | 0 | 1 |
| 1 | 69 | 1 | 28 | 8  | 8700   | 0 | 0 | 1 |
| 1 | 57 | 1 | 28 | 8  | 11450  | 0 | 0 | 1 |
| 1 | 62 | 1 | 29 | 12 | 6100   | 0 | 0 | 1 |
| 1 | 79 | 1 | 29 | 9  | 12600  | 1 | 0 | 0 |
| 1 | 60 | 1 | 31 | 11 | 15700  | 0 | 0 | 1 |
| 1 | 46 | 1 | 29 | 8  | 6200   | 0 | 0 | 1 |
| 1 | 65 | 1 | 29 | 8  | 126000 | 0 | 0 | 1 |
| 1 | 52 | 1 | 23 | 5  | 8050   | 1 | 0 | 1 |
| 1 | 54 | 0 | 31 | 7  | 10600  | 0 | 0 | 0 |
| 1 | 54 | 1 | 33 | 7  | 10000  | 0 | 0 | 1 |
| 1 | 43 | 1 | 23 | 10 | 3000   | 0 | 0 | 1 |
| 1 | 43 | 1 | 27 | 7  | 12000  | 0 | 0 | 1 |
| 1 | 29 | 1 | 26 | 7  | 8400   | 0 | 0 | 1 |
| 1 | 66 | 1 | 24 | 7  | 8100   | 0 | 0 | 1 |
| 1 | 35 | 1 | 27 | 7  | 7200   | 0 | 0 | 1 |
| 1 | 48 | 1 | 25 | 7  | 11460  | 0 | 0 | 1 |
| 1 | 55 | 1 | 32 | 7  | 11830  | 0 | 0 | 1 |
| 1 | 50 | 1 | 30 | 7  | 8590   | 0 | 0 | 1 |
| 1 | 68 | 0 | 26 | 10 | 8400   | 0 | 0 | 1 |
| 1 | 50 | 1 | 28 | 6  | 6800   | 0 | 0 | 1 |
| 1 | 67 | 1 | 31 | 1  | 6300   | 0 | 0 | 1 |
| 1 | 39 | 1 | 29 | 7  | 12770  | 1 | 0 | 1 |

---
